# Supplementary material for: Effects of Liraglutide on Left Ventricular Function: A Meta-Analysis of Randomized, Placebo-Controlled Trials
Source: Int J Endocrinol. 2021 Jun 15;2021:9993229. doi: 10.1155/2021/9993229 (PMC8219465; doi:10.1155/2021/9993229)
Supplement: Supplementary Materials — Online suppl. Figure 1: sensitivity analysis for the endpoint of A, LVEF; B, ΔLVEF; C, E/e′; D, Δe′; E, ΔE/e′. Online suppl. Figure 2: funnel plot for the endpoint of A, LVEF; B, ΔLVEF; C, E/e′; D, Δe′; E, ΔE/e′. [file 9993229.f1.zip]

Archive with 2 entries (2 files):
- 9993229.f1/Online suppl. Fig 1.doc
- 9993229.f1/Online suppl. Fig 2.doc
